# Supplementary material
Source: Springer Nature journal article supplement (https://www.springermedizin.de/resource/supplementary/12913_2013_2705_MOESM4_ESM.pdf/9531220)
Supplement: MOESM4 [file 9531220]

***Analytical hierarchy: iterative steps from raw data to informing policy and practice***

**Raw data**

- *Closely reading transcripts*

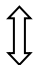

- *Identifying themes/indexing*
- *Coding/labelling/charting data*

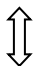

- *Summarizing/synthesizing data*
- *Identifying dimensions & categories*
- *Detecting patterns/clustering*

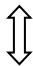

- *Seeking interpretations*

**Inform policy/practice**

***Analytical process***

Data management

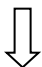

Descriptive accounts (what)

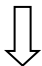

Explanatory accounts (why)
